# Supplementary material for: Secondary structure of the segment 5 genomic RNA of influenza A virus and its application for designing antisense oligonucleotides
Source: PubMed Central journal article supplement (PMC6406010; doi:10.1038/s41598-019-40443-7), 2019-03-07
Supplement: 41598_2019_40443_MOESM1_ESM.pdf [file 41598_2019_40443_MOESM1_ESM.pdf]

## SUPPLEMENTARY INFORMATION

### **Secondary structure of the segment 5 genomic RNA of influenza A virus and its application for designing antisense oligonucleotides**

Paula Michalak<sup>1</sup>, Marta Soszynska-Jozwiak<sup>1</sup>, Ewa Biala<sup>1</sup>, Walter N. Moss<sup>2</sup>, Julita Kesy<sup>1</sup>,  
Barbara Szutkowska<sup>1</sup>, Elzbieta Lenartowicz<sup>1</sup>, Ryszard Kierzek<sup>1</sup>, Elzbieta Kierzek<sup>1\*</sup>

<sup>1</sup>Institute of Bioorganic Chemistry Polish Academy of Sciences, 61-704 Poznan,  
Noskowskiego 12/14, Poland

<sup>2</sup>Roy J. Carver Department of Biophysics, Biochemistry and Molecular Biology, Iowa State  
University, Ames, IA 50011, United States of America

\*Corresponding author: E-mail: [elzbieta.kierzek@ibch.poznan.pl](mailto:elzbieta.kierzek@ibch.poznan.pl), Institute of Bioorganic  
Chemistry Polish Academy of Sciences, 61-704 Poznan, Noskowskiego 12/14, Poland, Tel.:  
+4861-853-8503; Fax: +4861-852-0532

| Name | Sequence 5'→3'                                    |
|------|---------------------------------------------------|
| PR1  | GCGTAATACGACTCACTATAGGGAGTAGAAACAAGGGTA<br>TTTTTC |
| PR2  | AGCAAAAGCAGGGTAGATAATC                            |

**Table S1.** Primers for PCR for obtaining vRNA5 DNA template.

| Name | Complementary vRNA5 region (nt) | Sequence 5'→3'            |
|------|---------------------------------|---------------------------|
| P1   | 1541-1565                       | AGCAAAAGCAGGGTAGATAATCAC  |
| 2L   | 1306-1331                       | GAgAGaATGgTACtCTcTGCAtTTG |
| 3L   | 1043-1063                       | CTcTcGTgCGtACtGGaATG      |
| P4   | 784-803                         | GATCAAGTGCGAGAGAGCAG      |
| P5   | 522-544                         | GTCAATTAGTGTGGATGGCATG    |
| P6   | 263-282                         | GGTCCAGAGAAACCTTCCC       |
| P7   | 1269-1287                       | CCTGGAAGAACACCCCAG        |
| P8   | 1092-1116                       | CCTGATGATATGGCATTCCAATCTA |

**Table S2.** DNA primers for reverse transcription. LNA is marked with small letter. All primers were 5'-labelled with JOE, FAM, TAMRA or ROX.

| Name | Sequence 5'→3'              | Length (nt) |
|------|-----------------------------|-------------|
| QF   | AGACCAATCTTGTCACCTCTGAC     | 23          |
| QR   | AGGGCATTGTTGGACAAAGCGTCTACG | 26          |
| QP   | TCACCGTGCCAGTGAGCGAGGACTGCA | 27          |
| RT   | ATGAGTCTTCTAACCGAGGTCG      | 22          |

**Table S3.** DNA primers for RT-qPCR. Primer QP was labelled with 6-TAMRA at 3' and 5-FAM at 5' end.

| Binding site <sup>a</sup>                          | Probe sequence <sup>b</sup> | Nucleotide of RNA target complementary to 3'g of hexamer probe <sup>c</sup> | $\Delta G^{\circ}_{37}$ (kcal/mol) for duplex modified probe/vRNAs <sup>d</sup> |         | Hybridization result <sup>e, f</sup> buffer 1, 37°C | Hybridization result <sup>e, g</sup> buffer 2, 37°C |
|----------------------------------------------------|-----------------------------|-----------------------------------------------------------------------------|---------------------------------------------------------------------------------|---------|-----------------------------------------------------|-----------------------------------------------------|
|                                                    |                             |                                                                             |                                                                                 |         |                                                     |                                                     |
| 20/114/891                                         | GdDdDg                      | U, C, A                                                                     | -7.79                                                                           | -9.81*  | m                                                   |                                                     |
| 21/273/783                                         | dGdDdg                      | U, G, A                                                                     | -9.00                                                                           |         | w                                                   | m                                                   |
| 22/184/355/<br>880/883/1251/<br>1280/1300/<br>1429 | dDgDdg                      | U, A, G, G, C,<br>C, G, C, A                                                | -9.24                                                                           | -11.37* | s                                                   | m                                                   |
| 23/257/815/<br>1182/1301                           | dDdGag                      | U, C, C, C, U                                                               | -8.39                                                                           | -10.19* | m                                                   | s                                                   |
| 30/48/472/958<br>/1185                             | GdCdDg                      | A, A, C, A, U                                                               | -8.62                                                                           | -10.64* | m                                                   |                                                     |
| 33/654/864/<br>1365/1491                           | UdUgDg                      | G, G, C, U, U                                                               | -8.47                                                                           |         | m                                                   | w                                                   |
| 36                                                 | GdGUdg                      | A                                                                           | -9.20                                                                           |         | m                                                   |                                                     |
| 37/135                                             | GgDgUg                      | U, G                                                                        | -10.82                                                                          |         |                                                     | m                                                   |
| 38/999/1170/<br>1178/1224                          | DgGdG                       | A, U, C, U, U                                                               | -9.46                                                                           |         | m                                                   | w                                                   |
| 41/276/324/<br>439/478/1074                        | CdGdGg                      | C, U, C, C, C,<br>U                                                         | -9.86                                                                           | -12.44* | m                                                   | m                                                   |
| 42/215/325/<br>371/785                             | GCdGdg                      | C, U, C, A, U                                                               | -10.44                                                                          | -12.57* | m                                                   | w                                                   |
| 50/1220                                            | GdGdCg                      | U, C                                                                        | -9.84                                                                           | -11.92* | m                                                   | w                                                   |
| 51/899/998/<br>1143/1177/<br>1223                  | GgDgAg                      | G, C, A, C, A,<br>C                                                         | -10.72                                                                          | -12.47* | m                                                   | m                                                   |
| 52/343/1227                                        | CgGdG                       | U, C, C                                                                     | -9.52                                                                           |         | m                                                   | m                                                   |
| 53/120/937/<br>1228                                | UCgGdg                      | C, G, A, C                                                                  | -10.23                                                                          | -12.36* | w                                                   | m                                                   |
| 54/938                                             | uUcGgg                      | U, U                                                                        | -9.28                                                                           |         | m                                                   |                                                     |
| 66/717/802/<br>920                                 | GGdUcg                      | A, U, U, U                                                                  | -9.63                                                                           |         |                                                     | m                                                   |
| 68/874/1036/<br>1260/1297                          | dDgGdg                      | A, A, A, G, U                                                               | -10.59                                                                          |         | m                                                   | m                                                   |
| 69/639/1298/<br>1362                               | GdAgGg                      | U, C, U, C                                                                  | -9.41                                                                           | -11.99* | m                                                   | m                                                   |
| 70/760/1363                                        | uGdDgg                      | C, U, C                                                                     | -9.17                                                                           | -12.1*  |                                                     | m                                                   |
| 71/78/1304/<br>1364/1490                           | dUgDdg                      | C, A, U, C, G                                                               | -9.11                                                                           | -11.24* | m                                                   | m                                                   |
| 105/116                                            | DcGdDg                      | G, U                                                                        | -9.22                                                                           | -11.24* |                                                     | m                                                   |
| 106/915/926/<br>1069/1499                          | dDcGag                      | U, G, C, C, A                                                               | -9.03                                                                           | -10.83* | m                                                   | m                                                   |
| 112/840/970/<br>1261                               | dDdGgg                      | G, C, C, U                                                                  | -9.43                                                                           | -12.36* | m                                                   |                                                     |
| 113/1560                                           | dDdDgg                      | C, G                                                                        | -8.08                                                                           | -11.01* | w                                                   | m                                                   |
| 117                                                | GDcGDg                      | U                                                                           | -8.80                                                                           | -10.82  | m                                                   |                                                     |
| 136/1359/1410                                      | GGgDg                       | A, C, C                                                                     | -9.91                                                                           |         |                                                     | m                                                   |
| 157/1394/1484                                      | dGdUgg                      | A, A, C                                                                     | -9.66                                                                           | -12.59* | m                                                   | s                                                   |
| 158/758                                            | DdGdUg                      | C, G                                                                        | -8.53                                                                           | -10.47* | m                                                   |                                                     |
| 159/759/881/<br>884/1249/1252<br>/1281/1430        | GdDgDg                      | A, A, U, U, G,<br>U, U, U                                                   | -9.74                                                                           |         | w                                                   | m                                                   |
| 160/348/375/<br>640/882/1250/<br>1299              | DgDdGg                      | U, G, G, C, U,<br>U, C                                                      | -9.61                                                                           | -12.19* | m                                                   | m                                                   |

|                                                          |        |                                 |        |         |   |   |
|----------------------------------------------------------|--------|---------------------------------|--------|---------|---|---|
| 161/214/349/<br>784/1347/1385<br>/1461                   | CdGdDg | C, G, C, U, G,<br>G, A,         | -9.07  | -11.09* | m | w |
| 171/796/1269                                             | DgUgCg | G, C, C                         | -10.74 | -12.82* | m |   |
| 172/797                                                  | dDgUgg | G, G                            | -9.44  |         | w | m |
| 174/258/1262/<br>1302                                    | GdDdGg | A, U, C, U                      | -8.58  | -11.16* | m | m |
| 175/228/339/<br>836/1214/1263<br>/1480                   | gGdDdg | C, A, G, A, A,<br>C, G          | -9.56  | -11.69* | w | m |
| 176/622/886/<br>1048/1283/143<br>2/1481                  | uGgDdg | U, A, C, A, C,<br>C, U          | -9.97  | -12.10* | w | m |
| 177/399/408/<br>804/887/948/<br>1044/1145/<br>1482       | dUgGdg | U, G, C, A, U,<br>C, G, C, U    | -10.46 | -12.59* | m | s |
| 178/529/805/<br>949/1483                                 | GdUgGg | U, G, U, U, U                   | -10.04 |         | w | m |
| 179/806/950/<br>1022/1087/<br>1112/1306                  | uGdUgg | C, C, C, G, G,<br>U, U          | -9.04  | -11.97* | w | m |
| 185/356/547                                              | uDdGdg | U, U, C                         | -8.78  | -10.91* | m | w |
| 201/416/563/<br>863                                      | dUgDgg | C, U, U, U                      | -9.9   | -12.83* | w | m |
| 216/241                                                  | GGCdGg | U, G                            | -9.64  |         | m | w |
| 218/321/1443                                             | AgGgC  | U, U, U                         | -10.01 |         |   | m |
| 200/220/505                                              | UGdGgg | U, C, U                         | -9.99  | -12.92* | w | m |
| 221/378/723/<br>1451                                     | CuGdGg | C, U, U, U                      | -9.62  | -12.20* | m |   |
| 229/340/1296                                             | DgGdDg | U, U, G                         | -10.17 |         |   | m |
| 230/311/1171                                             | CdGgAg | U, G, C                         | -10.05 | -11.80* | m | m |
| 244/1106                                                 | UdUgGg | G, G                            | -8.90  |         | m |   |
| 256/457/469/<br>546/814/1181                             | dDgDgg | G, C, A, A, G,<br>C             | -10.03 | -12.96* | s | m |
| 265                                                      | UcCcUg | A                               | -10.47 |         |   | s |
| 266                                                      | UUcCcg | A                               | -9.17  |         |   | s |
| 272/338/1479                                             | GdDdCg | G, U, A                         | -8.13  |         | m |   |
| 274/376/414/<br>561/641/859/<br>1072/1327                | GdGdDg | U, C, G, A, C,<br>A, G, A       | -9.50  | -11.52* | m | m |
| 275/642/644/<br>790/860/1073/<br>1203/1221/<br>1328/1330 | dGdGdg | U, U, C, C, U,<br>U, C, G, U, C | -10.71 | -12.84* | s | m |
| 291/1118                                                 | CCcDC  | A, G                            | -7.72  |         |   | m |
| 307/1292/1386<br>/1396/1486                              | dCdGdg | A, A, U, A, A                   | -9.83  |         | m | w |
| 308/452                                                  | GdCdGg | U, G                            | -9.41  |         | s | m |
| 377/415/562/<br>646/722/862/<br>1205/1450                | uGdGdg | U, U, U, C, C,<br>C, C, A       | -10.09 | -12.22* | s | s |
| 395                                                      | DcUcCg | U                               | -10.04 |         | w | s |
| 400/888/955/<br>1045/1146/<br>1211/1324/<br>1426         | DdUgGg | U, U, A, U, U,<br>C, A, A       | -9.12  | -11.70* | w | m |
| 411/849/1524                                             | dDcDug | C, G, G                         | -7.22  |         | m |   |
| 418/565/889/                                             | dDdUgg | U, U, C, U, C                   | -7.95  | -10.88* |   | m |

|                                                                           |        |                                             |        |         |   |   |
|---------------------------------------------------------------------------|--------|---------------------------------------------|--------|---------|---|---|
| 1090/1212                                                                 |        |                                             |        |         |   |   |
| 458/470                                                                   | cDdGdg | C, C                                        | -9.49  | -11.62* | m | m |
| 461                                                                       | uCcCa  | U                                           | -8.86  |         | w | s |
| 468/495                                                                   | DgDgUg | C, G                                        | -10.26 | -12.20* | m | m |
| 471/876                                                                   | DcDdGg | U, C                                        | -8.73  | -11.31* | m |   |
| 492/578/1513                                                              | gUcUcG | U, U, U,                                    | -9.63  |         | m |   |
| 496/1331                                                                  | UdGdGg | A, U                                        | -9.15  |         |   | m |
| 530/935/1034                                                              | GGdUgg | C, U                                        | -9.69  | -12.62* | w | m |
| 532/659                                                                   | GUgGdg | A, A                                        | -10.39 |         | m | m |
| 533                                                                       | uGuGgg | U                                           | -9.87  |         | w | m |
| 534/683                                                                   | gUGUgg | C, A                                        | -9.77  | -12.70* | s |   |
| 535                                                                       | DgUGUg | C                                           |        | -11.61* | s |   |
| 623/1433                                                                  | uUGdGg | U, U                                        | -9.41  |         |   | m |
| 435/966/639/<br>965/1553                                                  | GgGuAg | A, U, C, C, C                               | -9.79  | -11.54* | w | m |
| 638/839/969/<br>1016/1361                                                 | dDgGg  | A, U, C, A, U                               | -9.52  |         | m | w |
| 643/645/721/<br>789/791/861/<br>898/1066/1142<br>/1202/1204/<br>1222/1329 | GdGdGg | U, U, C, G, U,<br>U, C, G, C, G,<br>U, U, U | -10.29 | -12.87* | m |   |
| 657                                                                       | gGdUdg | A                                           | -9.83  |         | w | m |
| 669                                                                       | GCdGug | C                                           |        | -11.92* | m |   |
| 677                                                                       | DcGgDg | G                                           | -10.81 |         | s | s |
| 679/1189                                                                  | GUdCgg | C, U                                        | -8.68  | -11.61* | m |   |
| 614/726/779/<br>846                                                       | dUcCug | A, C, C, G                                  | -8.74  | -11.82* |   | m |
| 775/1411                                                                  | UgGgAg | U, C                                        | -10.53 | -12.28* | w | m |
| 787/812                                                                   | GdGCdg | C, U                                        | -10.44 | -12.57* | m | w |
| 792/1067                                                                  | CGdGdg | C, C                                        |        | -12.37* | w | m |
| 816/841/1183                                                              | CdDdGg | U, C, U                                     | -8.15  | -10.73* | m | m |
| 875/1017/1037<br>/1509                                                    | CDdGgg | U, C, U, G                                  | -9.39  | -12.32* | m | m |
| 885/1282/1431                                                             | GgDdGg | U, U, U                                     | -10.17 |         | w | m |
| 901/992/1049/<br>1244/1284                                                | CUgGdg | C, C, U, C, U                               | -10.37 | -12.5*  |   | m |
| 909                                                                       | CgGdAg | A                                           | -9.74  |         | s |   |
| 924/1001                                                                  | CgDgG  |                                             | -9.76  |         | m |   |
| 925/1068                                                                  | DcGdGg | C, U                                        | -10.01 | -12.59* | m | m |
| 936                                                                       | CgGdUg | C                                           |        | -12.12* | m | w |
| 952/1207                                                                  | GgUGDg | A, C                                        | -10.74 | -12.76* | m | w |
| 475/838/922/<br>961/1360                                                  | AgGgAg | G, U, A, G, C                               | -10.34 | -12.09* |   | s |
| 963                                                                       | gUdGgg | C                                           |        | -13.09* | w | m |
| 982                                                                       | CgGuGg | G                                           | -10.37 |         |   | m |
| 1013                                                                      | GgUcDg | U                                           | -10.25 |         | m |   |
| 1018                                                                      | GcDdGg | C                                           |        | -12.45* | s |   |
| 1077                                                                      | UdUcDg | C                                           |        | -10.00  |   | m |
| 1172/1445                                                                 | UCdGgg | U, C                                        | -9.50  | -12.43* | w | m |
| 774/837/1215/<br>1264/1469                                                | GgGdAg | A, U, U, U, G                               | -10.24 |         | w | m |
| 1241/1408                                                                 | GDgGUg | G, A                                        | -9.24  |         | m |   |
| 1253                                                                      | CGdDgg | U                                           | -9.32  |         |   | m |
| 795/1056/1270                                                             | gUGCg  | U, A, G                                     | -9.48  |         | m |   |
| 1272                                                                      | CCcDG  | A                                           | -8.17  |         |   | m |
| 1273                                                                      | CcCcA  | C                                           |        | -9.88*  |   | m |
| 1322                                                                      | UgGUdg | G                                           | -9.25  |         | m |   |

|           |        |      |        |         |   |   |
|-----------|--------|------|--------|---------|---|---|
| 1371/1533 | dGuGdg | G, G | -10.06 |         | m |   |
| 1374      | CUcDgg | A    | -9.32  |         | m |   |
| 536/ 1420 | UdGuGg | A, C | -8.50  | -11.08* | w | m |
| 964/1552  | GgUdGg | C, U | -9.98  | -12.56* | m | w |

**Table S4.** Isoenergetic microarrays probes that bind strongly and moderately to vRNA5 and their thermodynamic properties. a – binding sites of probes (all complementary possible targets), sites are denoted by the middle nucleotide of the complementary RNA region to specific pentamer; b - nucleotides in capital letter (A, C, G, U, D) are 2'-O-methyl-RNA nucleotides, in small letter (a, c, g, u, d) are LNA nucleotides, D and d are 2,6 –diaminopurine (2'-O-methyl type or LNA, respectively); c - listed nucleotides concern each binding sites in column 1, respectively; d-  $\Delta G^{\circ}_{37}$  calculated as modified probe/RNA duplex for listed binding sites <sup>1, 2</sup>, \* -  $\Delta G^{\circ}_{37}$  calculated for duplex of full complementary hexamer probe (3'g of probe is paired with C of RNA target); e - binding was considered strong (s), medium (m) and weak (w), when the integrated intensities were  $\geq 1/3$ ,  $\geq 1/9$  and  $\geq 1/27$  of the strongest intensity, respectively; f - hybridization condition: buffer 1 (300 mM NaCl, 5 mM MgCl<sub>2</sub>, 50 mM HEPES pH 7.5), 37°C; g - hybridization condition: buffer 2 (300 mM KCl, 5 mM MgCl<sub>2</sub>, 50 mM HEPES pH 7.5), 37°C.

| Name | Complementary vRNA5 region (nt) | Sequence 5'→3'       | Sites of RNase H cleavage                        |
|------|---------------------------------|----------------------|--------------------------------------------------|
| H1   | 72-83                           | CATGAATAAT           | 71 (w)<br>76 (w)<br>78 (w)<br>82 (w)             |
| H2   | 464-472                         | AAGAGTGG             | 681-683 (s)<br>471-472 (w)                       |
| H3   | 466-485                         | TTCATAAGAGGAAAGAAAGT | 750 (w)<br>751-754 (s)<br>755 (w)<br>470-484 (s) |
| H4   | 643-651                         | CTTTGAGAGAG          | 647 (s)<br>649-650 (s)                           |
| H5   | 676-684                         | GTGTACGG             | 676-684 (s)                                      |
| H6   | 878-888                         | TGGACGAAGGA          | 880-882 (w)<br>883 (s)                           |
| H7   | 886-895                         | GCGAAAATGG           | 890-891 (s)<br>893 (s)<br>895 (s)                |
| H8   | 1065-1073                       | AGAACGAGA            | 1067-1071 (s)<br>1073 (s)                        |
| H9   | 1102-1109                       | ATATGGCA             | x                                                |
| H10  | 1248-1260                       | GGACCCTAAGAAA        | 1250-1253 (w)<br>1254-1260 (s)<br>1261 (w)       |
| H11  | 1257-1264                       | GAAAGGAC             | 1261-1262 (w)<br>1264 (w)                        |
| H12  | 1336-1327                       | CAATAGAGAG           | 1331-1332 (s)<br>1334 (s)                        |
| H13  | 1425-1416                       | TGGTTAGTGG           | 1421-1425 (s)<br>1426 (w)                        |
| H14  | 1415-1427                       | ATGGTTAGTGGCA        | 1421-1427 (s)<br>1428 (w)                        |

**Table S5.** RNase H assay results for vRNA5 with listed DNA oligonucleotides. *s* - sites of strong RNase H cleavage; *w* - sites of weak RNase H cleavage; *x* - no cleavage.

| Name      | Complementary vRNA5 region (nt) | Sequence 5'→3' <sup>a</sup> | ASO type     |
|-----------|---------------------------------|-----------------------------|--------------|
| 79-18GP   | 70-87                           | cUu <u>UGACATGAGT</u> AuGa  | gapmer       |
| 474-21M   | 465-485                         | UUCAUAAGAGGAAAGAAAGU        | 2'OMeRNA     |
| 474-21L   | 465-485                         | UUcAUAAgAGGaAAgAAAGU        | 2'OMeRNA-LNA |
| 538-10L   | 534-543                         | UCaAUuGGUG                  | 2'OMeRNA-LNA |
| 883-11M   | 878-888                         | UGGACGAAGGA                 | 2'OMeRNA-LNA |
| 883-11L   | 878-888                         | UGgACgAAgGA                 | 2'OMeRNA-LNA |
| 1069-10L  | 1065-1074                       | GAGaACaAGA                  | 2'OMeRNA-LNA |
| 1148-18GP | 1140-1157                       | cAaG <u>C</u> AAACAATGGCgAa | gapmer       |
| 1253-13M  | 1248-1260                       | GGACCCUAAGAAA               | 2'OMeRNA     |
| 1253-13L  | 1248-1260                       | GGACCCUAAGAAA               | 2'OMeRNA     |
| 1333-16L  | 1326-1341                       | CAuAACaAuAGaGAGG            | 2'OMeRNA-LNA |
| 1420-13L  | 1415-1427                       | AuGaUUGGUGGaA               | 2'OMeRNA-LNA |
| 1420-13GP | 1415-1427                       | AuG <u>ATTGGT</u> GaA       | gapmer       |
| MX        | –                               | GUUAAGUAAUACAGAGAAGA        | 2'OMeRNA     |
| NEG       | –                               | AGACCUCUAUAGCAGCU           | 2'OMeRNA     |
| 1079-12M  | 1074-1085                       | GCCACAUAUCAG                | 2'OMeRNA     |

**Table S6.** Antisense oligonucleotides (ASOs) designed based on influenza virus vRNA5 secondary structure. NEG and MX are negative controls that are not complementary to vRNA5. MX is scramble oligonucleotide (mixmer) of 474-21M; a – nucleotides in capital letter (A, C, G, U) are 2'-O-methyl-RNA nucleotides, lower case letters (a, c, g, u) are LNA nucleotides, in gapmers the DNA nucleotides are underlined (A, C, G, T).



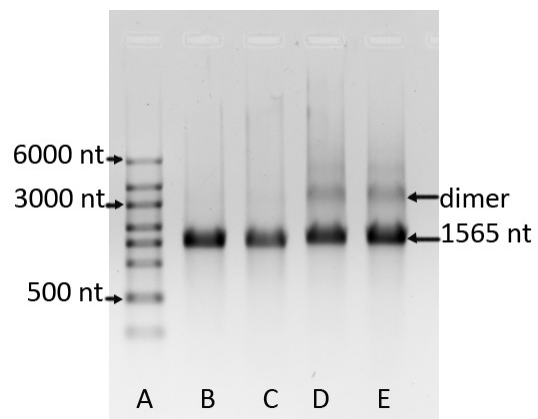

**Figure S1.** vRNA5 analysis by agarose gel electrophoresis. A – RiboRuler High Range RNA Ladder (Thermo Fisher Scientific), B – vRNA5 after folding in buffer 2; C – vRNA5 after folding in buffer 1; D - vRNA5 in buffer 2 without folding; E – vRNA5 in buffer 1 without folding (see Methods). One structure and no dimer formation was detected for folded RNA in both buffers.

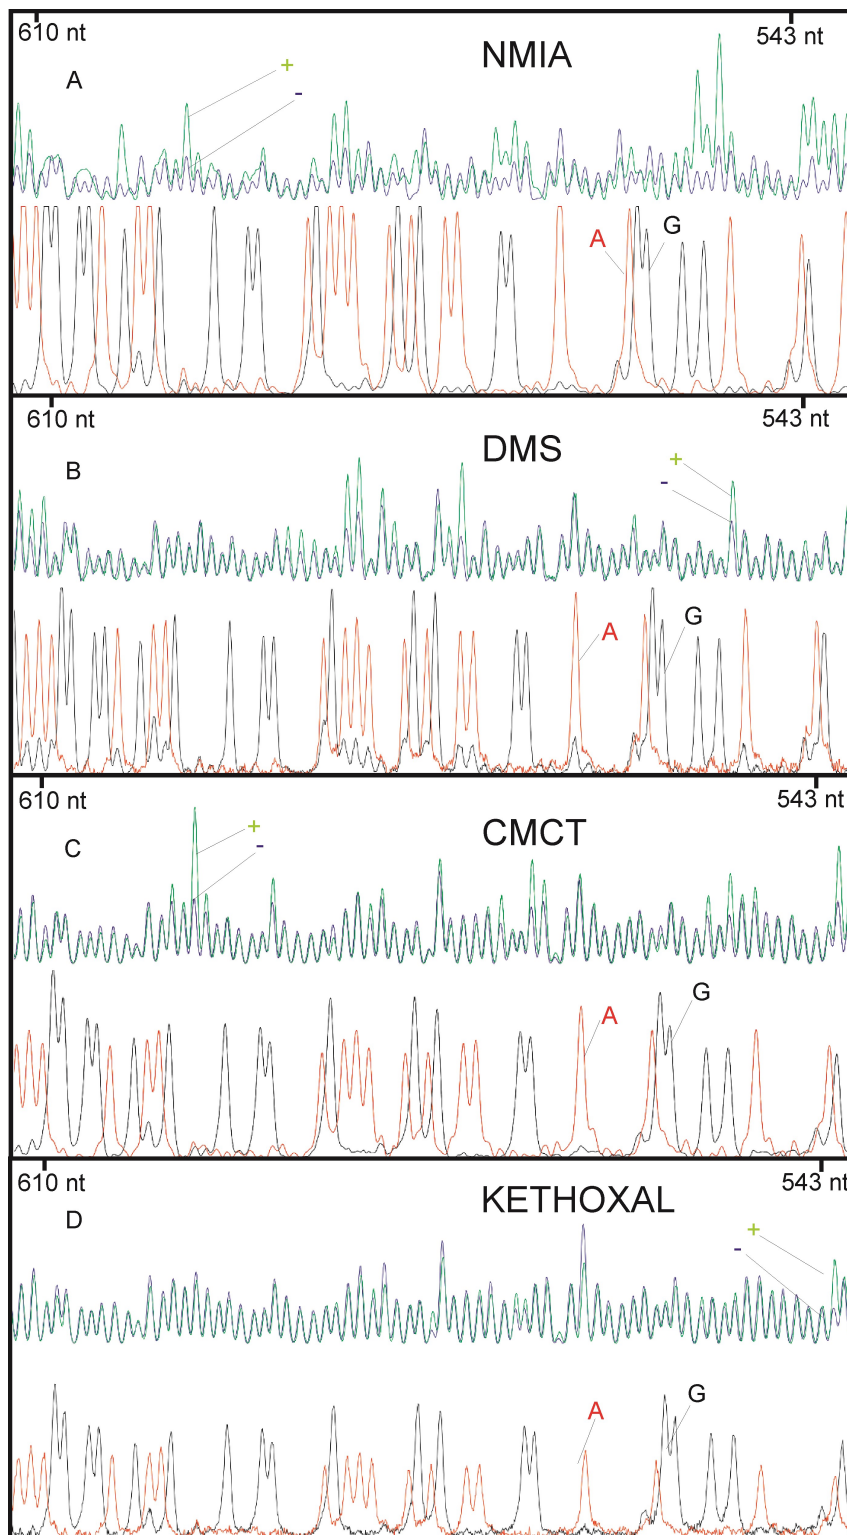

**Figure S2.** Example of capillary electrophoresis raw data of vRNA5 chemical modification results detected by reverse transcription (using only *Fitted Baseline Adjust* option in ShapeFinder program). On each panel is shown a fragment of SHAPEFinder window with reverse transcription products of chemical mapping with: A – NMIA; B – DMS; C – CMCT; D – kethoxal. The reaction products is a green line (5' labelled with JOE), control is a blue line (5' labelled with FAM). The DNA ladder is respectively a black line - G (5' labelled with TAMRA) and red line -A (5' labelled with ROX).

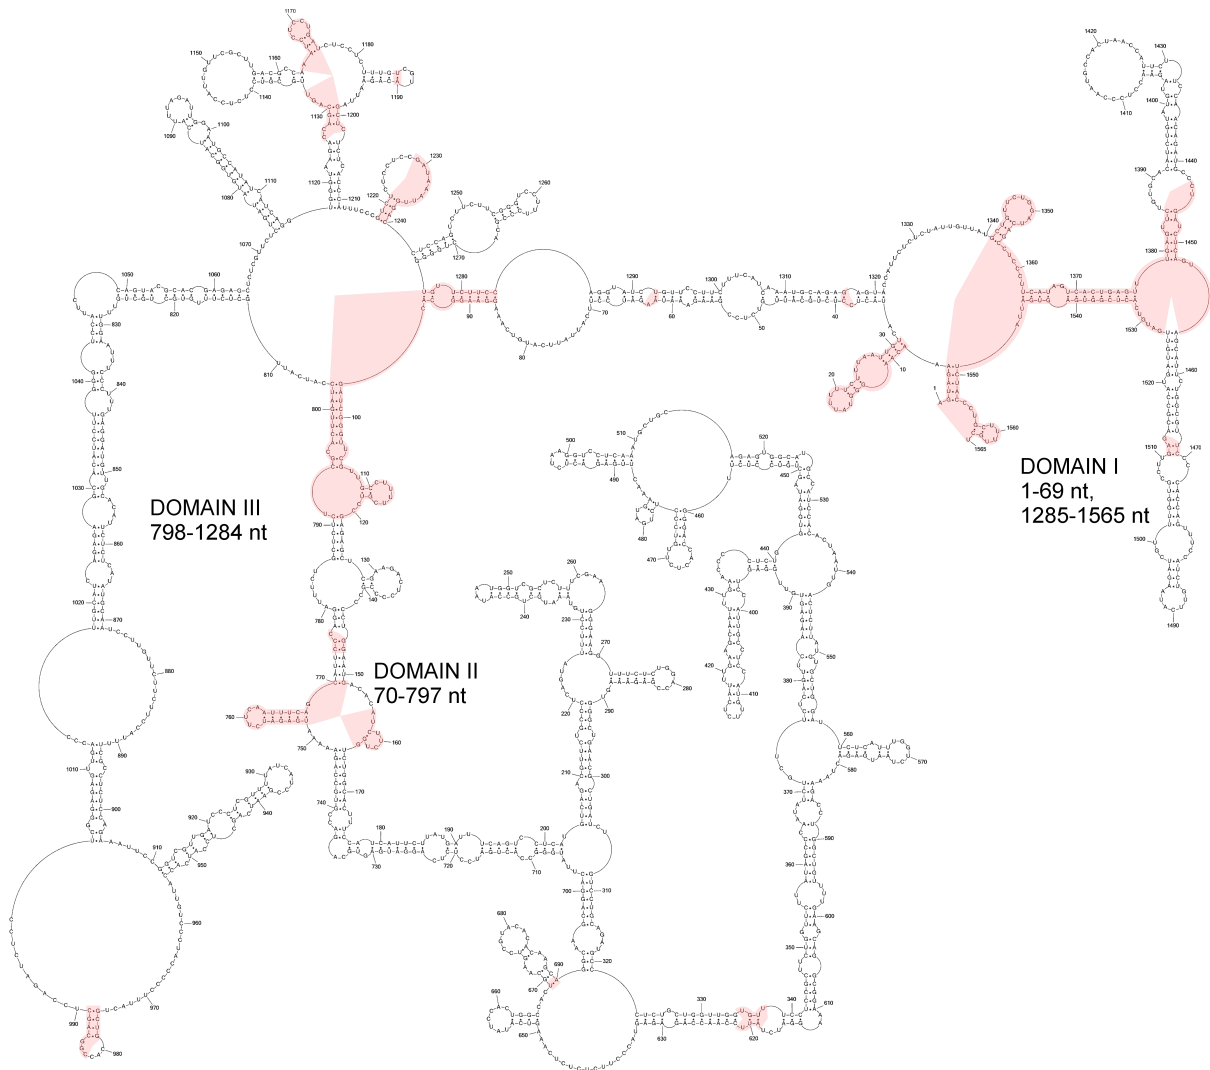

**Figure S3.** Secondary structure model of vRNA5 predicted with RNAstructure using constrains from chemical mapping at 23°C. Constrains from chemical mapping experiments with DMS, CMCT, kethoxal and NMIA were incorporated analogical as for data from 37°C. The secondary structure motifs that differ from 37°C structure model (Figure 1) are marked with pink colour.

**A**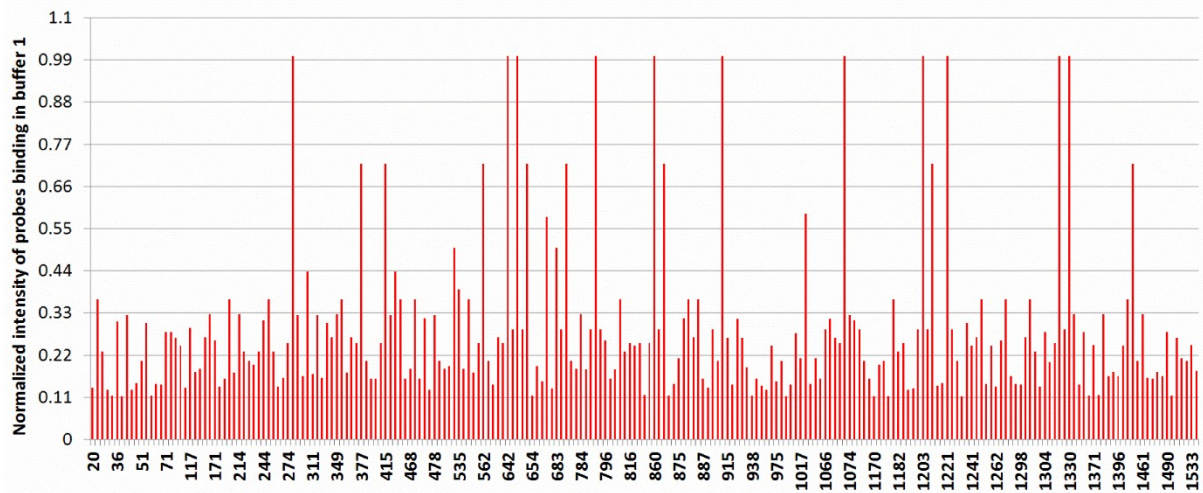**B**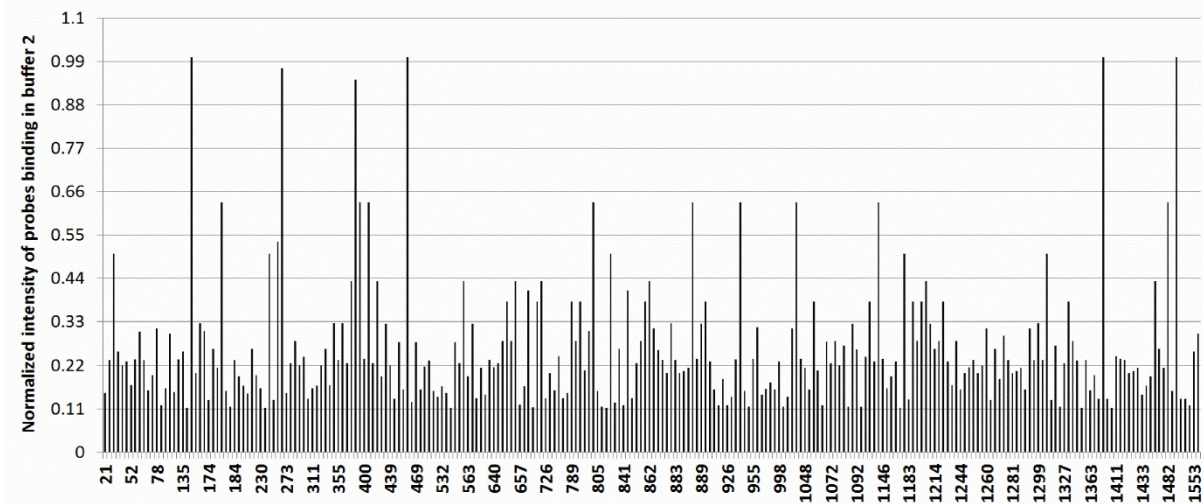

**Figure S4.** Results of hybridization of vRNA5 to isoenergetic microarrays. All complementary sites for probes that bind strongly or moderately are shown A - in buffer 1 at 37°C; B - in buffer 2 at 37°C. Binding was considered strong and medium when the integrated intensities were  $\geq 1/3$  and  $\geq 1/9$  of the strongest intensity. In graphs the bindings were normalized to the strongest intensity and have values in range 1–0.11, showing bindings:  $0.33 \leq$  strong and  $0.11 \leq$  medium  $< 0.33$ .

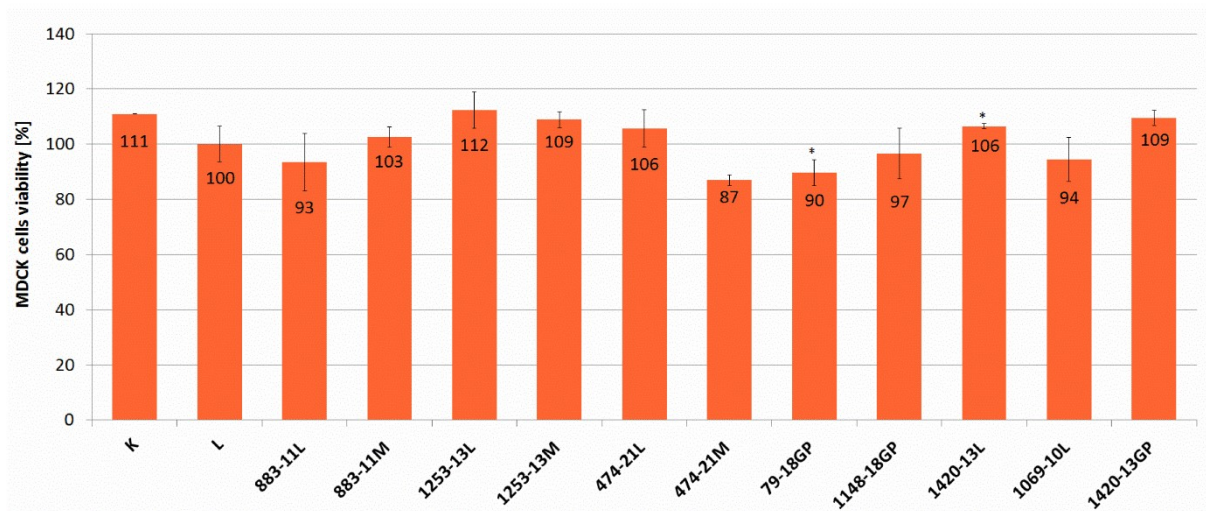

**Figure S5.** The MTT assay results for MDCK cells treated with 0.5  $\mu$ M of selected antisense oligonucleotide (ASO). The presented data are average percentages of three biological repeats. K - untreated cells, L- cells treated with Lipofectamine 2000. Statistics were calculated using a two-tailed T-test ( $p < 0.01$ ). Statistically important results are marked with \*.

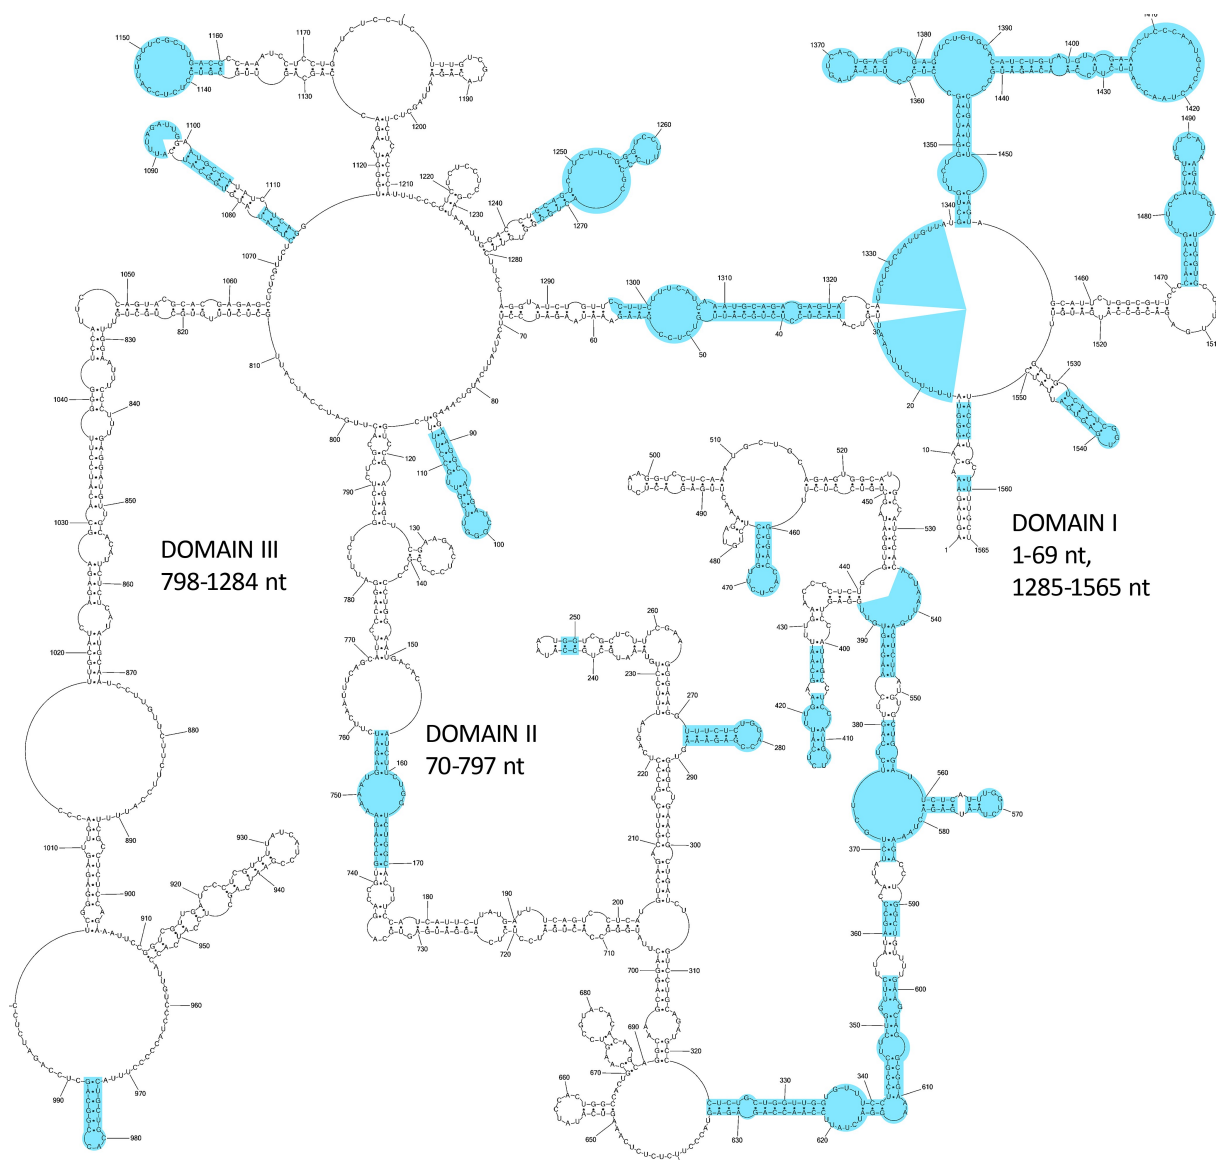

**Figure S6.** “Mirror motifs” found in determined secondary structures of vRNA5 [(-) strand] and (+)RNA5<sup>3</sup>. The motifs are marked by blue shadow on vRNA5 secondary structure model predicted by RNAstructure 5.7 using experimental data from 37°C as constraints.

## References

- 1 Kierzek, E., Ciesielska, A., Pasternak, K., Mathews, D. H., Turner, D. H., Kierzek, R. The influence of locked nucleic acid residues on the thermodynamic properties of 2'-O-methyl RNA/RNA heteroduplexes. *Nucleic Acids Res.* **33**, 5082-5093 (2005).
- 2 Pasternak, A., Kierzek, E., Pasternak, K., Fraczak, A., Turner, D. H., Kierzek, R. The thermodynamics of 3'-terminal pyrene and guanosine for the design of isoenergetic 2'-O-methyl-RNA-LNA chimeric oligonucleotide probes of RNA structure. *Biochemistry* **47**, 1249-1258 (2008).
- 3 Soszynska-Jozwiak, M., Michalak, P., Moss, W. N., Kierzek, R., Keszy, J., Kierzek, E. Influenza virus segment 5 (+)RNA - secondary structure and new targets for antiviral strategies. *Scientific Reports*, **7**: 15041 (2017).
